1 **Zebrafish Galectin 3 binding protein (Lgals3bp) is the target antigen of the microglial 4C4 monoclonal**  
2 **antibody**

3 Mireia Rovira<sup>1,2</sup>, Alice Montanari<sup>1,2</sup>, Latifa Hammou<sup>1</sup>, Laura Chomette<sup>1</sup>, Magali Miserocchi<sup>1,2</sup>, Jennifer  
4 Pozo<sup>1,2</sup>, Virginie Imbault<sup>1</sup>, Xavier Bisteau<sup>1</sup>, Valérie Wittamer<sup>1,2\*</sup>

5

6 <sup>1</sup>Institut de Recherche Interdisciplinaire en Biologie Humaine et Moléculaire (IRIBHM), Université Libre  
7 de Bruxelles (ULB), Brussels 1070, Belgium. <sup>2</sup>ULB Institute of Neuroscience (UNI), Université Libre de  
8 Bruxelles (ULB), Brussels 1070, Belgium.

9 **ABSTRACT**

10 Background:

11 Two decades ago, the fish-specific monoclonal antibody 4C4 was found to be highly reactive to zebrafish  
12 microglia, the macrophages of the central nervous system. This has resulted in 4C4 being widely used, in  
13 combination with available fluorescent transgenic reporters to identify and isolate microglia. However,  
14 the target protein of 4C4 remains unidentified, which represents a major caveat. In addition, whether the  
15 4C4 expression pattern is strictly restricted to microglial cells in zebrafish has never been investigated.

16 Results:

17 Having demonstrated that 4C4 is able to capture its native antigen from adult brain lysates, we used  
18 immunoprecipitation/mass-spectrometry, coupled to recombinant expression analyses, to identify its  
19 target. The cognate antigen was found to be a paralog of Galectin 3 binding protein (Lgals3bpb), known  
20 as MAC2-binding protein in mammals. Notably, 4C4 did not recognize other paralogs, demonstrating  
21 specificity. Moreover, our data show that Lgals3bpb expression, while ubiquitous in microglia, also  
22 identifies leukocytes in the periphery, including populations of gut and liver macrophages.

23 Conclusions:

24 The 4C4 monoclonal antibody recognizes Lgals3bpb, a predicted highly glycosylated protein whose  
25 function in the microglial lineage is currently unknown. Identification of Lgals3bpb as a new pan-microglia  
26 marker will be fundamental in forthcoming studies using the zebrafish model.

27

28 Zebrafish Galectin 3 binding protein (Lgals3bp) is the target antigen of the microglial 4C4 monoclonal  
29 antibody

30

31 **Running title:** Identification of the 4C4 antibody target antigen

32 **Authors:**

33 Mireia Rovira<sup>1,2</sup>, Alice Montanari<sup>1,2</sup>, Latifa Hammou<sup>1</sup>, Laura Chomette<sup>1</sup>, Magali Miserocchi<sup>1,2</sup>, Jennifer  
34 Pozo<sup>1,2</sup>, Virginie Imbault<sup>1</sup>, Xavier Bisteau<sup>1</sup>, Valérie Wittamer<sup>1,2\*</sup>

35 **Affiliations:**

36 <sup>1</sup>Institut de Recherche Interdisciplinaire en Biologie Humaine et Moléculaire (IRIBHM), Université Libre de  
37 Bruxelles (ULB), Brussels 1070, Belgium. <sup>2</sup>ULB Institute of Neuroscience (UNI), Université Libre de Bruxelles  
38 (ULB), Brussels 1070, Belgium.

39 \*Correspondence: [valerie.wittamer@ulb.be](mailto:valerie.wittamer@ulb.be)

40 **Telephone/fax number:**

41 Tel: + 32(0)25554221

42 Fax: + 32(0)25554655

43 **Keywords:** brain, macrophages, proteomics, lectin, MAC-2BP, zgc:112492.



45 **ABSTRACT**

46 Background:

47 Two decades ago, the fish-specific monoclonal antibody 4C4 was found to be highly reactive to zebrafish  
48 microglia, the macrophages of the central nervous system. This has resulted in 4C4 being widely used, in  
49 combination with available fluorescent transgenic reporters to identify and isolate microglia. However,  
50 the target protein of 4C4 remains unidentified, which represents a major caveat. In addition, whether the  
51 4C4 expression pattern is strictly restricted to microglial cells in zebrafish has never been investigated.

52 Results:

53 Having demonstrated that 4C4 is able to capture its native antigen from adult brain lysates, we used  
54 immunoprecipitation/mass-spectrometry, coupled to recombinant expression analyses, to identify its  
55 target. The cognate antigen was found to be a paralog of Galectin 3 binding protein (Lgals3bpb), known  
56 as MAC2-binding protein in mammals. Notably, 4C4 did not recognize other paralogs, demonstrating  
57 specificity. Moreover, our data show that Lgals3bpb expression, while ubiquitous in microglia, also  
58 identifies leukocytes in the periphery, including populations of gut and liver macrophages.

59 Conclusions:

60 The 4C4 monoclonal antibody recognizes Lgals3bpb, a predicted highly glycosylated protein whose  
61 function in the microglial lineage is currently unknown. Identification of Lgals3bpb as a new pan-microglia  
62 marker will be fundamental in forthcoming studies using the zebrafish model.

63

64

65

66

67

68

69

70

71

72

73



74 **INTRODUCTION**

75 Microglia are the resident macrophages in the central nervous system (CNS). They play key functions in  
76 maintaining brain homeostasis through their constant surveillance of the brain parenchyma and their  
77 interactions with other cells in the CNS. Microglia have been shown to exhibit both neuroprotective and  
78 neurotoxic functions and have important roles in brain diseases such as amyotrophic lateral sclerosis,  
79 multiple sclerosis, Parkinson's disease, Alzheimer's disease, glioma, or HIV-related dementia<sup>1,2</sup>. While our  
80 current understanding of microglia biology is mainly derived from investigations performed in mice, the  
81 zebrafish has also emerged over the past few years as a powerful complementary model to study microglia  
82<sup>3-5</sup>. Studies in zebrafish have provided new clues on the cellular and molecular requirements for microglia  
83 ontogeny and cell functions and have contributed to shedding light on evolutionary aspects of microglia  
84 properties across vertebrate species.

85  
86 In zebrafish, the study of microglia largely relies on the use of a variety of fluorescent reporter lines  
87 allowing to take full advantage of the transparency of the embryo to directly visualize microglial cells in  
88 their microenvironment. Antibodies labelling microglia in zebrafish have been limited since they are raised  
89 against mammalian proteins and usually display low cross-reactivity with zebrafish proteins. Among these,  
90 the 7.4.C4 monoclonal antibody, available as an hybridoma source (ECACC 92092321, deposited by A.  
91 Dowding from the King's College London, UK) and commonly referred to as "4C4", has been extensively  
92 used as a "fish macrophage/microglia-specific" antibody<sup>6-8</sup>. According to the ECACC datasheet, 4C4 was  
93 originally raised against protein extracts derived from optic nerves of the freshwater fish *Oreochromis*  
94 *mossambicus* at 12 days post injury. It was first used in zebrafish about 20 years ago, and suggested in  
95 immunofluorescence experiments to be highly specific for microglia, based on morphological criteria<sup>6,9</sup>.  
96 Since then, a growing number of publications have promoted 4C4 as an invaluable tool for the study of  
97 zebrafish microglia, and its use has been extended to flow cytometry as well as labeling of macrophages  
98 outside the CNS<sup>10</sup>. Despite its wide use, the 4C4 antibody has remained poorly characterized and, more  
99 importantly, its target protein is unknown. In this study, we sought to overcome these limitations. We  
100 report the identification of Galectin 3 binding protein (Lgals3bp) as the 4C4 antigen, using proteomic,  
101 molecular and genetic approaches. We further show that Lgals3bp is specifically expressed in microglia  
102 within the brain parenchyma across the zebrafish lifespan, and we uncovered 4C4 labelling in discrete  
103 populations of tissue macrophages.

104

105 **RESULTS**

106 **The 4C4 target antigen is ubiquitously expressed in zebrafish microglia**

107 We first examined the expression profile of the antigenic protein recognized by the 4C4 antibody in  
108 microglia across the life span. In the zebrafish embryo, microglia can be easily identified in the developing  
109 brain parenchyma based on *mpeg1*:GFP transgene expression<sup>11,12</sup>. We performed immunostaining for  
110 GFP and 4C4 on Tg(*mpeg1*:GFP) embryos at 3 days post fertilization (dpf), a stage where the phenotypic  
111 transition to differentiated microglia is completed<sup>11</sup>. As shown in Figure 1A, all GFP<sup>+</sup> microglia display 4C4  
112 immunostaining. These observations are consistent with previous reports and suggest that the 4C4  
113 antigen is constitutively and ubiquitously expressed among embryonic microglial cells. Next, we evaluated  
114 4C4 expression in adult microglia. We used the *p2ry12*:*p2ry12*-GFP line, where a P2ry12-GFP fusion  
115 protein is expressed under the control of the *p2ry12* promoter, a well-known canonical microglia marker  
116 in mammals and zebrafish<sup>13,14</sup>. We found that all GFP<sup>+</sup> cells co-localize with the 4C4 staining, as unveiled  
117 by immunofluorescence performed on adult brain sections (Figure 1B). Importantly, staining with the pan-  
118 leukocytic marker L-plastin (Lcp1) further confirmed the hematopoietic identity of the 4C4<sup>+</sup> cells within  
119 the adult brain parenchyma. Collectively, these results indicate that the 4C4 antibody labels all zebrafish  
120 microglia throughout life, regardless of their developmental origin<sup>11</sup>.

121

122 **The 4C4 antibody recognizes one or several proteins with high molecular weights**

123 As we ultimately sought to isolate and characterize the protein recognized by 4C4, we assessed whether  
124 this antibody is suitable for antigen detection in complex mixtures and we tested its performance in  
125 immunoblot applications. We prepared protein extracts from the zebrafish adult brain that were  
126 separated on a gel under denaturing conditions (SDS-PAGE) and followed by immunoblotting. This  
127 revealed several immunoreactive bands at molecular weights between 100-250 kDa (Figure 1C). While it  
128 was not possible to determine whether these bands represent variants of the same target protein or  
129 different proteins bearing the same epitope, we found that all were notably absent in brain lysates  
130 prepared from microglia-deficient *csf1r<sup>DM</sup>* fish (Figure 1C). This is consistent with the microglia-specific  
131 expression pattern observed for 4C4 by immunofluorescence in adult brain tissue sections. Collectively,  
132 these results indicate the functionality of 4C4 for immunoblot assays, allowing to unveil the existence of  
133 one or several microglial target proteins with high apparent molecular weight(s).

134

### 135 Immunoprecipitation coupled to mass-spectrometry identifies putative 4C4 targets

136 Our findings that 4C4 binds to its antigen under denaturing conditions indicate this antibody recognizes a  
137 linear epitope. We then tested whether 4C4 could also be efficient in precipitating its target. Therefore,  
138 to identify the antigen recognized by 4C4, we combined immunoprecipitation (IP) with mass spectrometry  
139 (MS) (Figure 2A). Brain protein extracts were incubated with either 4C4 or an isotype-matched control  
140 antibody (IgG1<sub>k</sub>) followed by the tryptic digestion of the precipitates. The resulting mixtures of tryptic  
141 peptides were then analyzed by liquid chromatography tandem mass spectroscopy (LC-MS/MS).  
142 Importantly, western-blotting analysis of the immunoprecipitates prior to enzymatic digestion showed  
143 that 4C4 specifically captured proteins in a similar pattern to that seen in direct immunoblotting, with  
144 molecular weights between 100-250 kDa. This suggests that the 4C4 antibody displays appreciable  
145 immunoprecipitation properties.

146 For LC-MS/MS analyses, five independent replicates of each IP experiment were performed and measured  
147 per condition. The proteomic analysis identified three proteins that were significantly enriched in the 4C4  
148 samples (Figure 2C, Supplementary Table S1 (<http://gofile.me/5ljcf/DdSQ5Dr8X>)). With a log<sub>2</sub> fold  
149 enrichment of 6.05 (p-val=0.0008) and 4.28 (p-val=0.009), respectively, the two most enriched candidates  
150 were the products of *galectin 3 binding protein b (lgals3bpb)* and *zgc:112492*, two paralogous genes  
151 predicted to encode proteins with a molecular weight of approximately 65 kDa. The third protein of  
152 interest was *Ependymin*, a 24 kDa protein showing a log<sub>2</sub> fold enrichment of 3.10 (p-val=0.01) and less  
153 than 25% shared identity with the two other candidates. To show the reproducibility of the different  
154 experiments, Figure 2D displays the number of spectral counts obtained from each IP for each of the three  
155 significantly identified enriched proteins identified. For every replicate, *lgals3bpb* protein appeared to be  
156 more enriched as presented by the higher number of spectral counts than the other two candidates  
157 (Figure 2D). This suggests a greater specificity of the 4C4 antibody for *lgals3bpb* than for the other two  
158 proteins. Importantly, although the predicted products of *lgals3bpb* and *zgc:112492* share around 80% of  
159 identity at the protein level (Figure 3A), we identified eighteen peptides that mapped exclusively with  
160 *Lgals3bpb*, covering 53% of the protein sequence (Figure 3B). Seven additional peptides mapping to  
161 conserved regions between the *lgals3bpb* and *zgc:112492* paralogs were also found. Remarkably,  
162 however, we only detected a single peptide corresponding to the gene product of *zgc:112492*. For  
163 *Ependymin*, we identified five peptides representing 50.7% total coverage. When browsing published  
164 datasets for expression<sup>8,15,16</sup>, we found that amongst the three candidates, only *lgals3bpb* was expressed  
165 at high level in microglia. Collectively, our IP-MS approach identified a limited number of proteins of

166 interest. Among these, *Lgals3bpb* appears as a strong candidate for the 4C4 antigen based on the spectral  
167 counts, the number of unique peptides, protein sequence coverage, and publicly available expression  
168 data.

169

#### 170 **The 4C4 antibody recognizes the protein encoded by the *lgals3bpb* gene**

171 To test our hypothesis, we cloned the coding sequence of zebrafish *lgals3bpb*, transiently expressed it in  
172 mammalian HEK-293T cells and assessed 4C4 antibody recognition by immunofluorescence. Controls  
173 included non-transfected cells and cells transfected with the empty pcDNA3 expression vector. As  
174 expected, no signal was detected in controls (Figure 4A-B). In contrast, cells transfected with *lgals3bpb*  
175 showed strong heterogenous staining with 4C4, indicating that the antibody detects the overexpressed  
176 *Lgals3bpb* in *lgals3bpb*-expressing cells (Figure 4C-D). Based on these findings, we sought to test whether  
177 the gene product of *zgc:112492*, the paralog of *lgals3bpb* also identified in our mass spectrometry  
178 analyses, was recognized by 4C4. However, overexpression of the coding sequence of *zgc:112492* in HEK-  
179 293T cells did not result in any staining (Figure 4E). These observations prompted us to also assess 4C4  
180 binding to cells engineered to express *lgals3bpa*, a third paralog which was not found in our proteomic  
181 analyses but shares 79.5 % identity with *lgals3bpb*. Like for *zgc:112492*, no 4C4 positive signal was  
182 observed for this paralog (data not shown). Taken together, these results indicate that *Lgals3bpb*, and not  
183 its paralogs, is the target of the 4C4 antibody.

184

#### 185 **Staining of the 4C4 antibody in peripheral tissues**

186 Having identified *Lgals3bpb* as the antigen for 4C4, we wondered whether the 4C4 antibody target protein  
187 is expressed in other zebrafish tissues in addition to the brain. Previous studies reported that *LGALS3BP*,  
188 the mammalian ortholog of zebrafish *lgals3bpb*, is expressed in different tissues at the mRNA and protein  
189 levels. We first investigated the presence of the protein by Western blotting in tissue extracts obtained  
190 from various adult zebrafish organs, including brain, eye, liver, intestine, heart, muscle, and whole kidney  
191 marrow, the site of hematopoiesis in the adult zebrafish. Consistent with the expression of *Lgals3bpb* in  
192 microglial cells, the 4C4 staining was especially intense in the brain and in the eye (Figure 5A). In other  
193 organs, however, the signal was absent or barely detectable. To complement these analyses, we also  
194 performed immunostaining with 4C4 on tissue sections from peripheral organs known to contain large

195 numbers of macrophages, such as liver<sup>17</sup> and intestine<sup>18,19</sup>. Samples were prepared from zebrafish  
196 carrying the *mpeg1*:GFP transgene, allowing to use GFP as a readout for the presence of macrophages in  
197 these tissues, and co-stained with 4C4, anti-GFP and anti-pan-leukocytic Lcp1 antibodies. In the liver, we  
198 occasionally found some 4C4<sup>+</sup> cells, which were all GFP<sup>+</sup> Lcp1<sup>+</sup>. Intriguingly, these cells were frequently  
199 seen in the vicinity of blood vessels, identified on the sections by the presence of erythrocyte nuclei  
200 stained with DAPI (Figure 5B-C). Although the *mpeg1* transgene also labels a subpopulation of B cells, we  
201 previously showed these cells are scarce in the liver<sup>18</sup>, indicating 4C4<sup>+</sup> GFP<sup>+</sup> cells likely represent  
202 macrophages. In the intestine, a proportion of GFP<sup>+</sup> Lcp1<sup>+</sup> cells also showed 4C4 immunoreactivity.  
203 However, we also identified GFP<sup>-</sup> Lcp1<sup>+</sup> 4C4<sup>+</sup> cells (Figure 5D), suggesting that in this organ, leukocytic  
204 *Lgals3bpb* expression may not be restricted to *mpeg1*:GFP<sup>+</sup> immune cells. It should also be noticed that in  
205 both organs, not all GFP<sup>+</sup> cells were labeled with the 4C4 antibody, suggesting that, unlike in microglia,  
206 *Lgals3bpb* is not ubiquitously expressed in peripheral macrophages.

207

## 208 DISCUSSION

209 The aim of this study was to perform a detailed characterization of 4C4, a monoclonal antibody that has  
210 emerged over the years as a useful tool for immunological investigations in zebrafish and now serves as a  
211 gold standard for the prospective detection and/or isolation of microglial cells in this model. Using  
212 immunoprecipitation followed by mass spectrometry, we have identified the protein target of 4C4 as  
213 Galectin 3 binding protein b, the product of the *lgals3bpb* gene. We have confirmed this identification by  
214 assessing antibody binding to HEK-293T cells engineered to express *Lgals3bpb*. Importantly, our results  
215 show that 4C4 is highly specific for *Lgals3bpb* as it could not recognize recombinant forms of two other  
216 *Lgals3bp* paralogs *in vitro*. Extending previous studies, we also show that 4C4 labels the majority, if not all  
217 microglial cells, in both the embryonic and adult brain parenchyma, validating 4C4 as a pan-microglial  
218 antibody. Finally, we also provide evidence of 4C4 immunoreactivity outside the brain, including in  
219 discrete populations of gut and liver *mpeg1*<sup>+</sup> immune cells.

220 Our identification of *Lgals3bpb* as a novel marker for zebrafish microglia is supported by several  
221 transcriptomic studies, which consistently display strong expression of the gene in bulk populations of  
222 embryonic<sup>8</sup> and adult<sup>18-21</sup> microglia/macrophages isolated based on fluorescent transgene expression.  
223 Recently, *lgals3bpb* transcripts were also found to be highly enriched in microglia in a single-cell  
224 transcriptomic profiling of juvenile zebrafish brain immune cells<sup>8,15,16,20,21</sup>. In comparison, expression of

225 the two paralogous genes *zgc:112492* and *lgals3bpa* in the microglia cluster appeared to be negligible.  
226 The microglial expression profile of *lgals3bpb* is also in sharp contrast with that of *Ependymin*, the third  
227 protein identified in our IP-MS experiments. The fact that *ependymin* transcripts are barely detected in  
228 microglia, together with the low protein sequence conservation with *Lgals3bpb*, make it an unlikely  
229 candidate for 4C4 recognition. Therefore, this protein was excluded from our downstream analyses. As  
230 Ependymin is secreted by meningeal fibroblast-like cells in teleost fish<sup>22-24</sup>, its detection in the IP-MS  
231 experiment might be explained by its high abundance in the brain extracellular and cerebrospinal fluids  
232 <sup>22-24</sup>.

233 *Lgals3bpb* is predicted as a zebrafish ortholog of the mammalian LGALS3BP (also known as MAC2-BP or  
234 tumor-associated antigen 90K), a member of the family of scavenger receptor cysteine-rich (SRCR)  
235 domain-containing proteins, with known intracellular and extracellular functions associated with the  
236 immune system. The human and zebrafish protein sequences share approximately 35% identity (not  
237 shown) and the structural features of the proteins are conserved in both species (a signal peptide, the  
238 SRCR domain, a BTB/POZ (Broad-Complex, Tramtrack and Bric a brac/Poxvirus and Zinc finger) domain,  
239 and a BACK (BTB and C-terminal Kelch) domain). In normal conditions, LGALS3BP expression is widely  
240 distributed among tissues<sup>25</sup> and the protein is also found in serum and body fluids such as saliva or  
241 cerebrospinal fluid<sup>26</sup>.

242 Our Western-blotting analyses indicate that *Lgals3bpb* is expressed in a more restricted manner than its  
243 mammalian ortholog. Indeed, we found strong 4C4 immuno-reactivity in adult organs containing  
244 microglial cells such as brain and eyes, but no signal in an extended panel of tissues. As zebrafish possess  
245 two other paralogs, it remains possible that *lgals3bpa* and/or *zgc:112492*, whose distribution patterns are  
246 currently unknown, will mark other organs, possibly in a complementary fashion. Nevertheless, despite  
247 being predominantly and ubiquitously expressed in microglia, it is clear that *lgals3bpb* is also expressed  
248 outside the zebrafish brain<sup>27</sup>, including in macrophages. Therefore, the use of 4C4 to label these cells will  
249 depend on the level and extend of *lgals3bpb* expression in the macrophage population in the tissue of  
250 interest.

251 It is known that mammalian microglia can express LGALS3BP. However, while we found zebrafish  
252 microglia constitutively express *Lgals3bpb* in homeostatic conditions, expression of the mammalian  
253 ortholog appears mainly to be linked to the disease-associated microglia (DAM) phenotype, a  
254 transcriptionally distinct microglial profile shared across various neurodegenerative disorders. For  
255 example, LGALS3BP transcripts are upregulated in microglial cells in murine models of Alzheimer's

256 disease-like, amyotrophic lateral sclerosis (ALS)<sup>28–30</sup> and chronic autoimmune diseases<sup>31</sup>, as well as glioma  
257<sup>32</sup> or demyelinated injuries<sup>33</sup>, suggesting a possible role for LGALS3BP in activated microglia. It will be  
258 interesting to investigate whether the divergences of expression observed between species confer  
259 different microglia functionalities.

260 Protein databases (UniProtKB) predict that, similar to its mammalian counterpart<sup>26,34</sup>, zebrafish *Lgals3bpb*  
261 is highly glycosylated. Interestingly, the protein bands detected by 4C4 in SDS-PAGE have higher apparent  
262 molecular weight than that calculated based on *Lgals3bpb* protein sequence. Given the lack of antibody  
263 cross-reactivity with any of the other two *Lgals3bpb* paralogs, it is tempting to speculate that these protein  
264 bands correspond to different *Lgals3bpb* isoforms resulting from alternative splicing and/or glycosylation.  
265 In support of the latter, LGALS3BP calculated molecular weight is approximately 65 kDa and its secreted,  
266 glycosylated form is found at 90-100 kDa in Western blotting<sup>26,34</sup>. Importantly, glycosylation of the  
267 mammalian protein is essential for its secretion and interaction with a variety of extracellular signaling  
268 molecules (e.g., galectin-1, galectin-3, galectin-7, integrins, collagens, DC-SIGN). Our findings may support  
269 a conserved extracellular localization of *lgals3bpb* and a possible role in extracellular matrix interactions  
270 between microglia and other cells in the CNS. However, there is also evidence that LGALS3BP possesses  
271 intracellular activity, mediated, for example, through interactions with cytoplasmic proteins such as TAK1,  
272 a member of the NF- $\kappa$ B pathway<sup>35,36</sup>. As the roles and modes of action of LGALS3BP in the microglia  
273 lineage remain elusive, zebrafish may thus provide a convenient model for the functional dissection of  
274 this enigmatic protein in an *in vivo* context.

275 In summary, our work reveals the identity of the 4C4 protein target and validates this antibody as a useful  
276 tool for the prospective identification of microglia during the zebrafish life span. The 4C4 antibody has  
277 been previously used for immunofluorescence and flow cytometry<sup>7,8,37</sup> and here, we demonstrate its  
278 suitability for two additional applications: western blotting and immunoprecipitation. The recognition of  
279 both the denatured and native forms of the *Lgals3bpb* protein by 4C4 indicates that its epitope is linear  
280 and accessible in the native protein structure, although additional work will be required to address this  
281 question. Identification of *Lgals3bpb* as the 4C4 antigen will now allow the zebrafish immunology field to  
282 move forward on a more solid footing and will open new avenues for understanding the biological  
283 functions of this evolutionary conserved microglial marker using the zebrafish model.

284

285



## 286 **EXPERIMENTAL PROCEDURES**

### 287 **Zebrafish husbandry**

288 Zebrafish were maintained under standard conditions, according to FELASA<sup>38</sup> and institutional (Université  
289 Libre de Bruxelles, Brussels, Belgium; ULB) guidelines and regulations. All experimental procedures were  
290 approved by the ULB ethical committee for animal welfare (CEBEA) from the ULB. The following transgenic  
291 lines were used: Tg(*mpeg1.1:eGFP*)<sup>gl22</sup><sup>39</sup> (here referred to as *mpeg1:GFP*) and TgBAC(*p2ry12:p2ry12-*  
292 *GFP*)<sup>hdb3</sup><sup>13</sup>. The *csf1r* double mutant line used is a combination of *csf1ra*<sup>j4e1</sup><sup>40</sup> and *csf1rb*<sup>sa1503</sup> mutants  
293 (here referred to as *csf1r<sup>DM</sup>*)<sup>41</sup>. Unless specified, the term “adult” fish refers to animals aged between 4  
294 months and 1 year old. For clarity, throughout the text, transgenic animals are referred to without allele  
295 designations.

### 296 **Hybridoma culture and antibody purification**

297 The hybridoma cell line for 4C4 antibody production was purchased (7.4.C4 ECACC 92092321, Sigma) and  
298 maintained in the laboratory following the manufacturer recommended cell culture conditions. For the  
299 production and purification of the monoclonal antibody the hybridoma was sent to ProteoGenix (France).  
300 The purified version of the antibody was used for the experiments.

### 301 **Western blotting**

302 Sample preparation and immunoblotting was performed as previously described<sup>42</sup>. Briefly, fish were  
303 sampled after the experiments and euthanized by immersion in 0.25 mg/ml of buffered MS-222 (Sigma).  
304 Individual brains were dissected in PBS and flash frozen in liquid nitrogen and processed immediately or  
305 stored at -80°C. Frozen zebrafish adult brains were lysed in RIPA buffer (Sigma), 1mM  
306 phenylmethylsulfonyl fluoride (PMSF), 1X protease inhibitor cocktail (Sigma). Protein extracts were  
307 quantified using Pierce 660nm Protein Assay (Pierce 22660). 50 µg of total protein was denaturalized in  
308 NuPAGE LDS sample buffer (Invitrogen), resolved on a 7.5% SDS-PAGE gel and transferred to a  
309 nitrocellulose membrane (Amersham, GE Healthcare). Membranes were blocked, incubated overnight at  
310 4°C with primary antibody, washed and incubated with an anti-rabbit or anti-mouse HRP-conjugated  
311 secondary antibody (1:20,000, Invitrogen). Primary antibodies used for western blotting were: 7.4.C4  
312 (1:200) and beta actin (1:1000, Proteintech) was used as a loading control. Immunoreactive bands were  
313 developed using enhanced chemiluminescence method (LumiGLO, Cell Signalling) and visualized (Fusion  
314 Solo S, FusionCapt Advance Solo software).



## 315 **Immunoprecipitation**

316 Frozen zebrafish adult brains (n = 50) were lysed in NP-40 buffer (25 mM Tris HCl pH7.5, NaCl 75 mM, NP-  
317 40 0.5%, NaF 25 mM) with 10% glycerol, 1 mM DTT and protease inhibitors (1 mM PMSF, 1X protease  
318 inhibitor cocktail). Lysates were quantified as described in the previous section. Thirty microliters of  
319 protein G/protein A agarose beads (EMD Millipore) were washed with lysis buffer (containing protein  
320 inhibitors) and incubated with 5 µg of 4C4 antibody or IgG1<sub>k</sub> as a control isotype (ab18443 Abcam) at 4°C  
321 overnight under rotation. Next, agarose beads were washed and incubated with 5 mg of brain protein  
322 lysate during 5h at 4°C under rotation and washed with lysis buffer. For WB analyses, agarose beads were  
323 resuspended in 100 µl of NuPAGE LDS sample buffer (Invitrogen). For MS analysis, agarose beads were  
324 washed in lysis buffer without NP-40, washed once in milliQ water, dried, flash frozen in liquid nitrogen,  
325 and stored at -80°C until processing.

## 326 **Liquid chromatography-Mass Spectrometry (LC-MS/MS)**

327 Dried agarose beads were resuspended in SDC buffer (sodium deoxycholate 1%, 10 mM TCEP, 55 mM  
328 chloroacetamide, 100 mM Tris HCl pH8.5) and denatured during 10 minutes at 95°C. Samples were diluted  
329 two-fold with 100 mM of triethylammonium bicarbonate (TEAB) and proteins were digested during 3  
330 hours with 1 µg of trypsin (Promega V5111) and 1 µg of LysC (Wako 129-02541) at 37°C. Peptides were  
331 purified using SDB-RPS columns (Affinisep). Briefly, digested peptides were diluted two-fold with 2%  
332 TFA/isopropanol, mixed thoroughly and loaded on a SDB-RPS column. After washing (1% TFA/isopropanol  
333 followed by 5% ACN/0.2% TFA), peptides were eluted with 5% NH<sub>4</sub>OH/60% ACN and evaporated to  
334 dryness at 45°C. 80% of resuspended peptides (8/10 µl in 100% H<sub>2</sub>O/0.1% HCOOH) were injected on a  
335 Triple TOF 5600 mass spectrometer (Sciex, Concord, Canada) interfaced to an EK425 HPLC System  
336 (Eksigent, Dublin, CA) and data were acquired using Data-Dependent-Acquisition (DDA). Peptides were  
337 injected on a separation column (Eksigent ChromXP C18, 150 mm, 3 µm, 120 Å) using a two steps  
338 acetonitrile gradient (5-25% ACN/0.1% HCOOH in 48 min then 25%-60% ACN/0.1% HCOOH in 20 min at 5  
339 µl/min) and were sprayed online in the mass spectrometer. MS1 spectra were collected in the range 400-  
340 1250 m/z with an accumulation of 250 ms. The 20 most intense precursors with a charge state 2-4 were  
341 selected for fragmentation, and MS2 spectra were collected in the range of 50-2000 m/z with an  
342 accumulation of 100 ms; precursor ions were excluded for reselection for 12 s.

## 343 **MS data analysis**

344 Raw data were analyzed using Fragpipe computational platform (v15.0) with MSFragger<sup>43</sup> (v3.2),  
345 Philosopher<sup>44</sup> (v3.4.13; build 1611589727) and IonQuant<sup>45</sup> Peptides identifications were obtained using  
346 MSFragger search engine on .mzML files, from converted .Wiff/Wiff.scan files, on a protein sequence  
347 database of zebrafish (UP0000004372021) from Uniprot (downloaded 24th Feb, 2021, containing “sp”  
348 and “tr” sequences, no isoforms) supplemented with common contaminant proteins and reversed protein  
349 sequences as decoys. Mass tolerances for precursors and fragments were set to 30 and 20 ppm  
350 respectively, and with spectrum deisotoping mass calibration<sup>46</sup>, and parameter optimization enabled.  
351 Enzyme specificity was set to “trypsin” with enzymatic cleavage and a maximum of 5 missed trypsin  
352 cleavages were allowed. Isotope error was set to 0/1/2. Peptide length was set from 6 to 50, and peptide  
353 mass was set from 500 to 5000 Da. Variable modifications (methionine oxidation, acetylation of protein  
354 N-termini, and pyro-Glu [-17.0265 Da]) were added while carbamidomethylation of Cysteine was set as a  
355 fixed modification. Maximum number of variable modifications per peptide was set to 5. MS/MS search  
356 results were further processed using the Philosopher toolkit with PeptideProphet (with options for  
357 accurate mass model binning, semi-parametric modeling with computation of possible non-zero  
358 probabilities for decoy entries) and with ProteinProphet. Further filtering to 1% protein-level FDR allowing  
359 unique and razor peptides were used and final generated reports were filtered at each level (PSM, ion,  
360 peptide, and protein) at 1% FDR. Label free quantification was performed using IonQuant with MBR and  
361 normalization enabled, 2 ions minimal and default options. Further statistical analysis and visualization  
362 were performed in R (v4.1) using commonly used packages. Distribution of protein intensity were  
363 normalized using a quantile normalization method (apmsWapp::norm.inttable v1.0) and enrichment was  
364 calculated for each pair of IP (4C4 vs IgG CTL), averaged and subjected to a paired t-test.

365 Multiple sequence alignment of the sequence of the 3 top hits and of its paralogs was generated using  
366 Clustal Omega webtool ([www.ebi.ac.uk/Tools/msa/clustalo/](http://www.ebi.ac.uk/Tools/msa/clustalo/))<sup>47</sup>, visualized using Jalview and manually  
367 annotated.

### 368 **Cloning and transient expression of *Igals3bpb* and *zgc:112492***

369 The 1719 bp coding sequence (CDS) of the *Igals3bpb* (ENSDARG00000040528), was amplified using a high-  
370 proof reading polymerase (CloneAmp HiFi, Takara) with primers containing *EcoRI* and *NotI* restriction sites  
371 and subcloned into pCR blunt II TOPO vector for subsequent restriction and ligation into the pcDNA3  
372 expression vector. The cloned CDS was compared with the original and no amino acid mutations were  
373 found. The 1686 bp CDS of the *zgc:112492* was synthesized and cloned into pcDNA3 containing *KpnI* and  
374 *EcoRI* restrictions sites (GeneCust, France). The human embryonic kidney (HEK293T) cells were cultured

375 in Dulbecco's modified Eagle's medium (DMEM) supplemented with 10% FBS and transfected with  
376 Lipofectamine 2000 (Invitrogen) according to manufacturer's instructions. For immunofluorescence, 100  
377 ng of pcDNA3 empty or pcDNA3-*lgals3bpb*, pcDNA3-*zgc:112492*, were used to transfect  $1.25 \times 10^5$  cells  
378 plated on 0.1% gelatin-coated coverslips in 24-well plates. HEK293T cells were fixed 2 days after  
379 transfection in 4% PFA for 30min at RT, washed three times in PBS and stored at 4°C to perform  
380 immunostaining (see below).

### 381 **Immunostaining and imaging**

382 Adult tissues were dissected, fixed in 4% PFA, incubated overnight in 30% sucrose:PBS before snap-  
383 freezing in OCT (Tissue-Tek, Leica) and stored at -80°C. Immunostaining was performed on 14  $\mu$ m  
384 cryosections as described<sup>11</sup>. For HEK293 cells, a blocking step of 30 min at RT was performed (3% BSA, 5%  
385 donkey/sheep serum, 0.3% Triton X-100) before incubation with the mouse 4C4 monoclonal antibody  
386 overnight at 4°C. Cells were washed 3 times in PBS and incubated with a mouse secondary antibody  
387 (1:500, Abcam) and DAPI (1:1000, Thermofisher). The following primary and secondary antibodies were  
388 used: chicken anti-GFP polyclonal antibody (1:500; Abcam), rabbit anti-DsRed polyclonal antibody (1:500;  
389 Clontech), rabbit anti-Lcp1 (1:1000), mouse 4C4 monoclonal antibody (1:200), Alexa Fluor 488-conjugated  
390 anti-chicken IgG antibody (1:500; Invitrogen), Alexa Fluor 488-conjugated anti-mouse IgG antibody (1:500;  
391 Invitrogen), Alexa Fluor 594- conjugated anti-rabbit IgG (1:500; Abcam) and Alexa Fluor 647- conjugated  
392 anti-mouse IgG (1:500; Abcam).

393 Imaging was performed on a confocal Zeiss LSM 780 inverted microscope, using a Plan Apochromat 20 $\times$   
394 objective for adult sections and a LDLCI Plan Apochromat 25 $\times$  water-immersion objective for whole-  
395 mount embryos and tissue-cleared brains. For HEK293 cells, confocal images were acquired using a Plan  
396 Apochromat 20x or LDC Apochromat 40x objective using numerical zoom, as indicated in the figure  
397 legends.

398

### 399 **ACKNOWLEDGEMENTS**

400 This study was funded by the Fonds de la Recherche Scientifique (FNRS) (F451218F, UN06119F and  
401 UG03019F to V.W., and 1236220F to M.R.) and the Minerve Foundation (to V.W.). This work was also  
402 supported by a Research Fellowship from the FNRS (to A.M.), and fellowships from the Erasme Fund (to  
403 L.C.), the Belgian Kid's Fund (to M.M.), and the Televie (to J.P.). This project has also received funding from  
404 the European Union's Horizon 2020 research and innovation programme under the Marie Skłodowska-

405 Curie grant agreement No 843107 (to X.B.) and from the Région de Bruxelles Capitale – Innoviris (RBC/BFB  
406 1 to X.B.) We thank Marianne Caron for technical assistance and members of the Wittamer lab for critical  
407 discussion and comments on the manuscript.

408

#### 409 **SUPPLEMENTAL MATERIAL**

410 Supplementary Table S1 (xlsx): MS results.

411

#### 412 **CONFLICT OF INTEREST**

413 The authors declare no competing or financial interests.

414

#### 415 **REFERENCES**

- 416 1. Sierra A, Paolicelli RC, Kettenmann H. Cien Años de Microglía: Milestones in a Century of  
417 Microglial Research. *Trends Neurosci.* 2019;42(11):778-792. doi:10.1016/j.tins.2019.09.004
- 418 2. Wolf SA, Boddeke HWGM, Kettenmann H. Microglia in Physiology and Disease. *Annu Rev Physiol.*  
419 2017;79(1):619-643. doi:10.1146/annurev-physiol-022516-034406
- 420 3. Gore A V., Pillay LM, Venero Galanternik M, Weinstein BM. The zebrafish: A fantastic model for  
421 hematopoietic development and disease. *WIREs Dev Biol.* 2018;7(3):e312. doi:10.1002/wdev.312
- 422 4. Wittamer V, Bertrand JY. Yolk sac hematopoiesis: does it contribute to the adult hematopoietic  
423 system? *Cell Mol Life Sci.* 2020;77(20):4081-4091. doi:10.1007/s00018-020-03527-6
- 424 5. Sieger D, Peri F. Animal models for studying microglia: The first, the popular, and the new. *Glia.*  
425 2013;61(1):3-9. doi:10.1002/glia.22385
- 426 6. Becker T, Becker CG. Regenerating descending axons preferentially reroute to the gray matter in  
427 the presence of a general macrophage/microglial reaction caudal to a spinal transection in adult  
428 zebrafish. *J Comp Neurol.* 2001;433(1):131-147. doi:10.1002/cne.1131
- 429 7. Chia K, Mazzolini J, Mione M, Sieger D. Tumor initiating cells induce Cxcr4-mediated infiltration of  
430 pro-tumoral macrophages into the brain. *Elife.* 2018;7. doi:10.7554/eLife.31918

- 431 8. Mazzolini J, Le Clerc S, Morisse G, et al. Gene expression profiling reveals a conserved microglia  
432 signature in larval zebrafish. *Glia*. 2020;68(2):298-315. doi:10.1002/glia.23717
- 433 9. Becker T, Bernhardt RR, Reinhard E, Wullimann MF, Tongiorgi E, Schachner M. Readiness of  
434 zebrafish brain neurons to regenerate a spinal axon correlates with differential expression of  
435 specific cell recognition molecules. *J Neurosci*. 1998;18(15):5789-5803.  
436 doi:10.1523/JNEUROSCI.18-15-05789.1998
- 437 10. Flinn MA, Jeffery BE, O’Meara CC, Link BA. Yap is required for scar formation but not myocyte  
438 proliferation during heart regeneration in zebrafish. *Cardiovasc Res*. 2019;115(3):570-577.  
439 doi:10.1093/CVR/CVY243
- 440 11. Ferrero G, Mahony CB, Dupuis E, et al. Embryonic Microglia Derive from Primitive Macrophages  
441 and Are Replaced by cmyb-Dependent Definitive Microglia in Zebrafish. *Cell Rep*. 2018;24(1):130-  
442 141. doi:10.1016/j.celrep.2018.05.066
- 443 12. Svahn AJ, Graeber MB, Ellett F, et al. Development of ramified microglia from early macrophages  
444 in the zebrafish optic tectum. *Dev Neurobiol*. 2013;73(1):60-71. doi:10.1002/dneu.22039
- 445 13. Sieger D, Moritz C, Ziegenhals T, Prykhozhij S, Peri F. Long-Range Ca<sup>2+</sup> Waves Transmit Brain-  
446 Damage Signals to Microglia. *Dev Cell*. 2012;22(6):1138-1148. doi:10.1016/j.devcel.2012.04.012
- 447 14. Jurga AM, Paleczna M, Kuter KZ. Overview of General and Discriminating Markers of Differential  
448 Microglia Phenotypes. *Front Cell Neurosci*. 2020;14:198. doi:10.3389/fncel.2020.00198
- 449 15. Kuil LE, Oosterhof N, Ferrero G, et al. Zebrafish macrophage developmental arrest underlies  
450 depletion of microglia and reveals Csf1r-independent metaphocytes. *Elife*. 2020;9:e53403.  
451 doi:10.7554/eLife.53403
- 452 16. Wu S, Nguyen LTM, Pan H, et al. Two phenotypically and functionally distinct microglial  
453 populations in adult zebrafish. *Sci Adv*. 2020;6(47):eabd1160. doi:10.1126/sciadv.abd1160
- 454 17. Guilliams M, Bonnardel J, Haest B, et al. Spatial proteogenomics reveals distinct and  
455 evolutionarily conserved hepatic macrophage niches. *Cell*. Published online January 11, 2022.  
456 doi:10.1016/j.cell.2021.12.018
- 457 18. Ferrero G, Gomez E, Lyer S, et al. The macrophage-expressed gene ( mpeg ) 1 identifies a  
458 subpopulation of B cells in the adult zebrafish. *J Leukoc Biol*. 2020;107(3):431-443.

- 459 doi:10.1002/JLB.1A1119-223R
- 460 19. Earley AM, Graves CL, Shiao CE. Critical Role for a Subset of Intestinal Macrophages in Shaping  
461 Gut Microbiota in Adult Zebrafish. *Cell Rep.* 2018;25(2):424-436.  
462 doi:10.1016/j.celrep.2018.09.025
- 463 20. Silva NJ, Dorman LC, Vainchtein ID, Horneck NC, Molofsky A V. In situ and transcriptomic  
464 identification of microglia in synapse-rich regions of the developing zebrafish brain. *Nat*  
465 *Commun.* 2021;12(1):5916. doi:10.1038/s41467-021-26206-x
- 466 21. Oosterhof N, Kuil LE, van der Linde HC, et al. Colony-Stimulating Factor 1 Receptor (CSF1R)  
467 Regulates Microglia Density and Distribution, but Not Microglia Differentiation In Vivo. *Cell Rep.*  
468 2018;24(5):1203-1217.e6. doi:10.1016/j.celrep.2018.06.113
- 469 22. Hoffmann W, Schwarz H. Ependymins: Meningeal-Derived Extracellular Matrix Proteins at the  
470 Blood-Brain Barrier. In: *International Review of Cytology*. Vol 165. Academic Press; 1996:121-158.  
471 doi:10.1016/S0074-7696(08)62221-4
- 472 23. Garina D V. Ependymins: New Data on Participation in the Regulation of Physiological and  
473 Behavioral Responses in Teleosts (Review). *Inl Water Biol.* 2021;14(1):78-86.  
474 doi:10.1134/S199508292101003X
- 475 24. Gebriel M, Prabhudesai S, Uleberg K-E, et al. Zebrafish brain proteomics reveals central proteins  
476 involved in neurodegeneration. *J Neurosci Res.* 2014;92(1):104-115. doi:10.1002/jnr.23297
- 477 25. Uhlén M, Fagerberg L, Hallström BM, et al. Tissue-based map of the human proteome. *Science*  
478 (80- ). 2015;347(6220). doi:10.1126/SCIENCE.1260419/SUPPL\_FILE/1260419\_UHLEN.SM.PDF
- 479 26. Costa J, Pronto-Laborinho A, Pinto S, et al. Investigating LGALS3BP/90 K glycoprotein in the  
480 cerebrospinal fluid of patients with neurological diseases. *Sci Rep.* 2020;10(1):5649.  
481 doi:10.1038/s41598-020-62592-w
- 482 27. Farnsworth DR, Saunders LM, Miller AC. A single-cell transcriptome atlas for zebrafish  
483 development. *Dev Biol.* 2020;459(2):100-108. doi:10.1016/J.YDBIO.2019.11.008
- 484 28. Holtman IR, Raj DD, Miller JA, et al. Induction of a common microglia gene expression signature  
485 by aging and neurodegenerative conditions: a co-expression meta-analysis. *Acta Neuropathol*  
486 *Commun.* 2015;3(1):31. doi:10.1186/S40478-015-0203-5/FIGURES/6

- 487 29. Mathys H, Adaikkan C, Gao F, et al. Temporal Tracking of Microglia Activation in  
488 Neurodegeneration at Single-Cell Resolution. *Cell Rep.* 2017;21(2):366-380.  
489 doi:10.1016/j.celrep.2017.09.039
- 490 30. Keren-Shaul H, Spinrad A, Weiner A, et al. A Unique Microglia Type Associated with Restricting  
491 Development of Alzheimer’s Disease. *Cell.* 2017;169(7):1276-1290.e17.  
492 doi:10.1016/J.CELL.2017.05.018/ATTACHMENT/63D76284-8C53-4D00-93AA-  
493 E1E70B1AE6DE/MMC7.XLSX
- 494 31. Makinde HM, Winter DR, Procissi D, et al. A Novel Microglia-Specific Transcriptional Signature  
495 Correlates With Behavioral Deficits in Neuropsychiatric Lupus. *Front Immunol.* 2020;11:230.  
496 doi:10.3389/FIMMU.2020.00230/BIBTEX
- 497 32. Ochocka N, Segit P, Walentynowicz KA, et al. Single-cell RNA sequencing reveals functional  
498 heterogeneity of glioma-associated brain macrophages. *Nat Commun.* 2021;12(1):1151.  
499 doi:10.1038/s41467-021-21407-w
- 500 33. Hammond TR, Dufort C, Dissing-Olesen L, et al. Single-Cell RNA Sequencing of Microglia  
501 throughout the Mouse Lifespan and in the Injured Brain Reveals Complex Cell-State Changes.  
502 *Immunity.* 2019;50(1):253-271.e6. doi:10.1016/j.immuni.2018.11.004
- 503 34. Iacobelli S, Bucci I, D’Egidio M, et al. Purification and characterization of a 90 kDa protein  
504 released from human tumors and tumor cell lines. *FEBS Lett.* 1993;319(1-2):59-65.  
505 doi:10.1016/0014-5793(93)80037-U
- 506 35. Loimaranta V, Hepojoki J, Laaksoaho O, Pulliainen AT. Galectin-3-binding protein: A multitask  
507 glycoprotein with innate immunity functions in viral and bacterial infections. *J Leukoc Biol.*  
508 2018;104(4):777-786. doi:10.1002/JLB.3VMR0118-036R
- 509 36. Hong CS, Park MR, Sun EG, et al. Gal-3BP Negatively Regulates NF-κB Signaling by Inhibiting the  
510 Activation of TAK1. *Front Immunol.* 2019;10:1760. doi:10.3389/FIMMU.2019.01760/BIBTEX
- 511 37. Mazzolini J, Chia K, Sieger D. Isolation and RNA Extraction of Neurons, Macrophages and  
512 Microglia from Larval Zebrafish Brains. *J Vis Exp.* 2018;(134):e57431. doi:10.3791/57431
- 513 38. Aleström P, D’Angelo L, Midtlyng PJ, et al. Zebrafish: Housing and husbandry recommendations.  
514 *Lab Anim.* 2020;54(3):213-224. doi:10.1177/0023677219869037



- 515 39. Ellett F, Pase L, Hayman JW, Andrianopoulos A, Lieschke GJ. mpeg1 promoter transgenes direct  
516 macrophage-lineage expression in zebrafish. *Blood*. 2011;117(4):e49-56. doi:10.1182/blood-  
517 2010-10-314120
- 518 40. Parichy DM, Ransom DG, Paw B, Zon LI, Johnson SL. An orthologue of the kit-related gene *fms* is  
519 required for development of neural crest-derived xanthophores and a subpopulation of adult  
520 melanocytes in the zebrafish, *Danio rerio*. *Development*. 2000;127(14):3031-3044.  
521 doi:10.1242/dev.127.14.3031
- 522 41. Ferrero G, Misericocchi M, Di Ruggiero E, Wittamer V. A *csf1rb* mutation uncouples two waves of  
523 microglia development in zebrafish. *Development*. Published online December 9,  
524 2020:dev.194241. doi:10.1242/dev.194241
- 525 42. Rovira M, Borràs DM, Marques IJ, Puig C, Planas J V. Physiological Responses to Swimming-  
526 Induced Exercise in the Adult Zebrafish Regenerating Heart. *Front Physiol*. 2018;9:1362.  
527 doi:10.3389/fphys.2018.01362
- 528 43. Kong AT, Leprevost F V., Avtonomov DM, Mellacheruvu D, Nesvizhskii AI. MSFragger: ultrafast  
529 and comprehensive peptide identification in mass spectrometry–based proteomics. *Nat*  
530 *Methods*. 2017;14(5):513-520. doi:10.1038/nmeth.4256
- 531 44. da Veiga Leprevost F, Haynes SE, Avtonomov DM, et al. Philosopher: a versatile toolkit for  
532 shotgun proteomics data analysis. *Nat Methods*. 2020;17(9):869-870. doi:10.1038/s41592-020-  
533 0912-y
- 534 45. Yu F, Haynes SE, Nesvizhskii AI. IonQuant Enables Accurate and Sensitive Label-Free  
535 Quantification With FDR-Controlled Match-Between-Runs. *Mol Cell Proteomics*. 2021;20:100077.  
536 doi:10.1016/j.mcpro.2021.100077
- 537 46. Teo GC, Polasky DA, Yu F, Nesvizhskii AI. Fast Deisotoping Algorithm and Its Implementation in  
538 the MSFragger Search Engine. *J Proteome Res*. 2021;20(1):498-505.  
539 doi:10.1021/acs.jproteome.0c00544
- 540 47. Madeira F, Park Y mi, Lee J, et al. The EMBL-EBI search and sequence analysis tools APIs in 2019.  
541 *Nucleic Acids Res*. 2019;47(W1):W636-W641. doi:10.1093/nar/gkz268
- 542



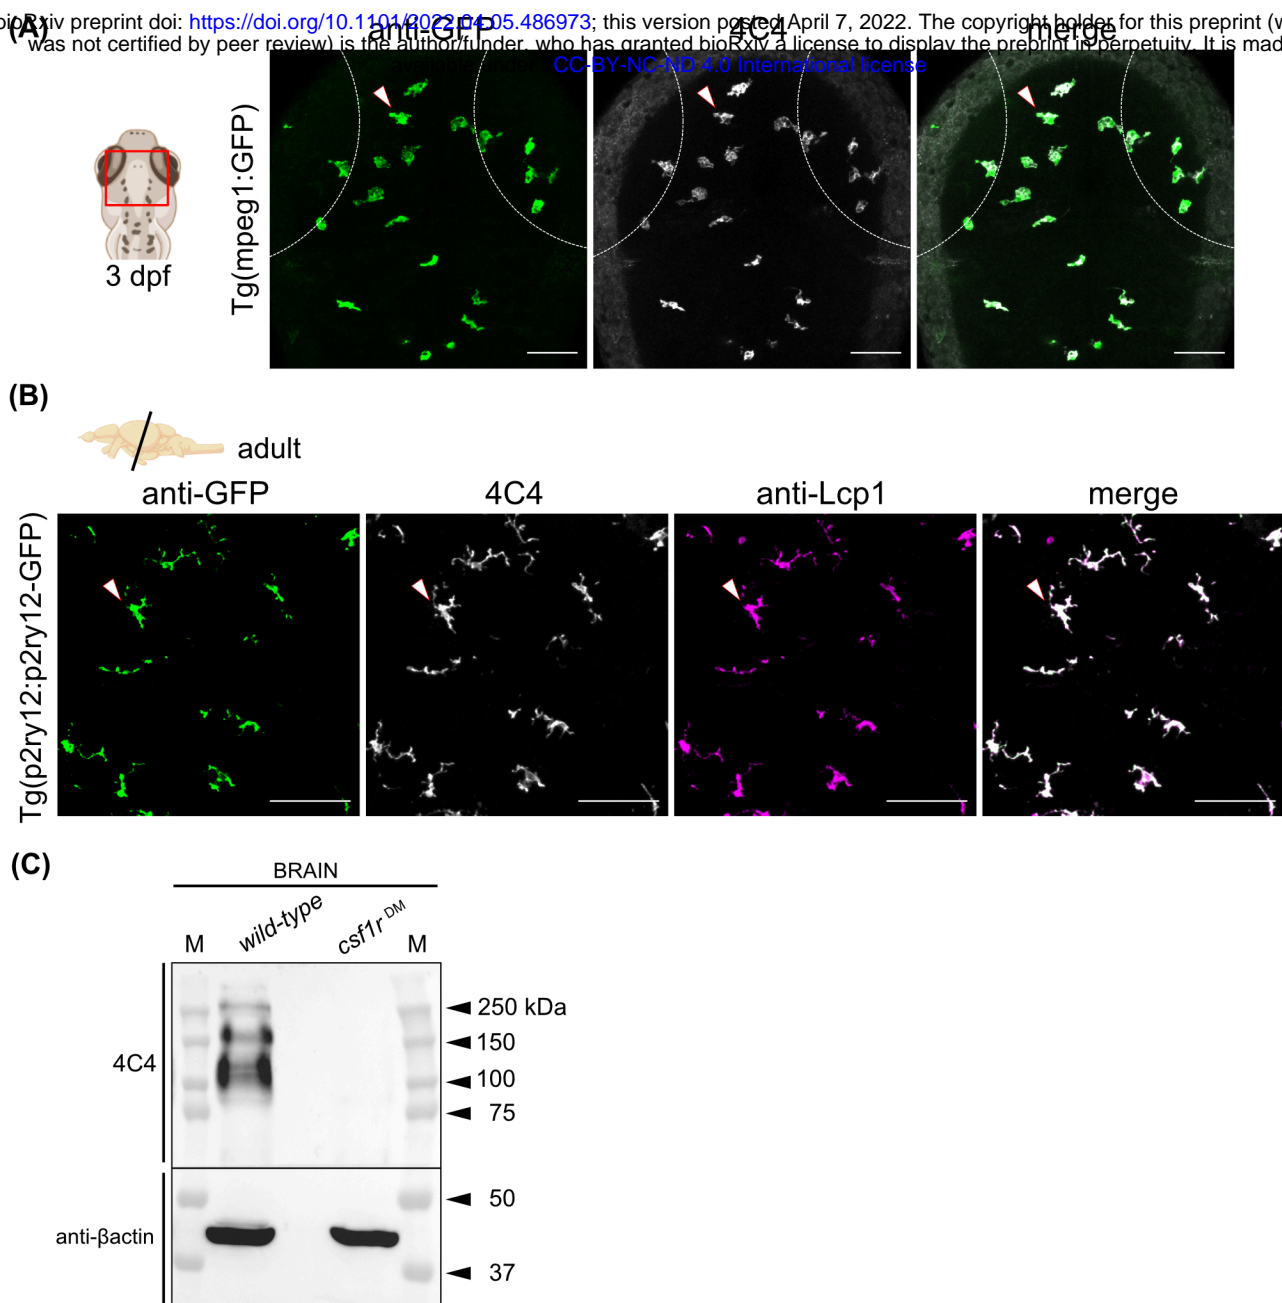

**Figure 1. The 4C4 antibody labels microglial cells in the embryonic and adult zebrafish brain. (A)** Dorsal view (red rectangle) of the optic tectum of a *Tg(mpeg1:GFP)* embryo at 3 dpf co-immunostained with the 4C4 antibody. Anti-GFP (green), 4C4 (grey) and merge of the two channels are shown. Dashed lines represent the eye edges. Images were taken using a 25X water-immersion objective. **(B)** Immunofluorescence on transversal brain sections (14  $\mu$ m) from adult *Tg(p2ry12-p2ry12:GFP)* zebrafish co-immunostained with 4C4 and Lcp1 (L-plastin) antibodies. Anti-GFP (green), 4C4 (grey), anti-Lcp1 (magenta) and merge of the three channels. Images were taken using a 20X objective. Images in (A) and (B) correspond to orthogonal projections and the white arrowheads point to microglial cells. Scale bars 50  $\mu$ m. dpf, days post-fertilization. **(C)** Detection of the 4C4 target protein by western blot. Protein lysate from a *wild-type* and a *csf1r<sup>DM</sup>* mutant adult brain.  $\beta$ actin was used as a loading control. M, protein marker.

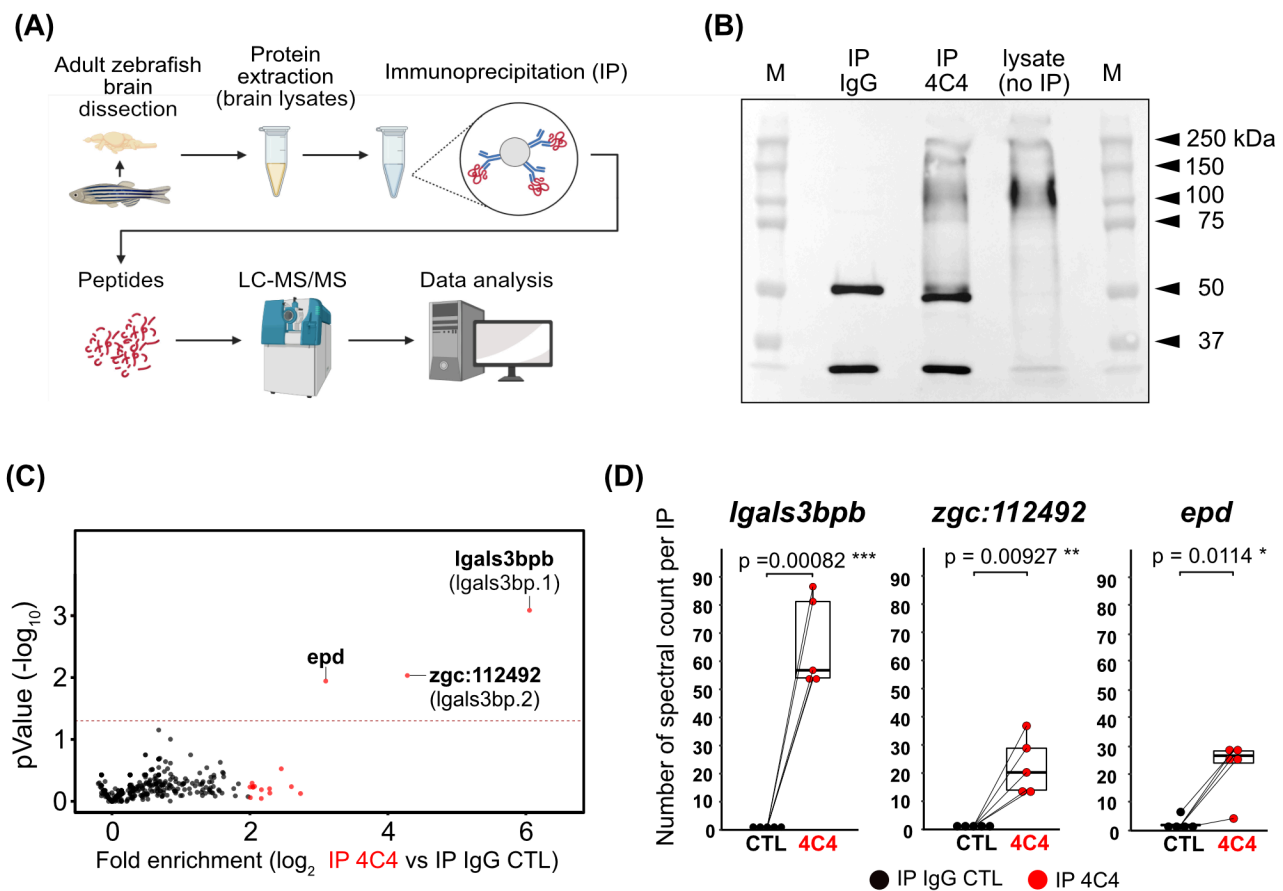

**Figure 2. Identification of candidate 4C4 antigens by proteomic analysis.** **(A)** Antigen identification strategy, from sample preparation to LC-MS analysis. **(B)** Immunoprecipitation (IP) of the target protein detected by western blot using the 4C4 antibody. Full blot showing: IP using the control isotype antibody IgG<sub>k1</sub> (IP IgG), IP using the 4C4 antibody (IP 4C4), brain lysate as a positive control (lysate). The two bands detected in the IP samples correspond to the heavy and light chains (50 and 25 kDa approximately) of the primary antibody that are being recognized by the secondary antibody. M, protein marker; kDa, kilodaltons. **(C)** Volcano plot of averaged enrichment of protein in 4C4 (IP 4C4) versus IgG<sub>k</sub> control (IP IgG CTL) immunoprecipitations. Red dots: enriched proteins (Fold change  $\geq 2$ ) p-val $<0.05$ . **(D)** Reproducibility boxplot of the total number of spectral counts quantified in each IP linked by pair (n=5 independent experiments) for the 3 most significantly enriched proteins are shown. \*\*\*p $<0.001$ , \*\*p $<0.01$ , \*p $<0.05$ ; paired t-test.

**(A) Percent identity matrix - protein coding sequences**

| Gene ID            | Gene symbol | Igals3bpb | zgc:112492 | epd    |
|--------------------|-------------|-----------|------------|--------|
| ENSDARG00000040528 | Igals3bpb   | 100.00    |            |        |
| ENSDARG00000076848 | zgc:112492  | 81.04     | 100.00     |        |
| ENSDARG00000103498 | epd         | 23.23     | 24.50      | 100.00 |

**(B)**

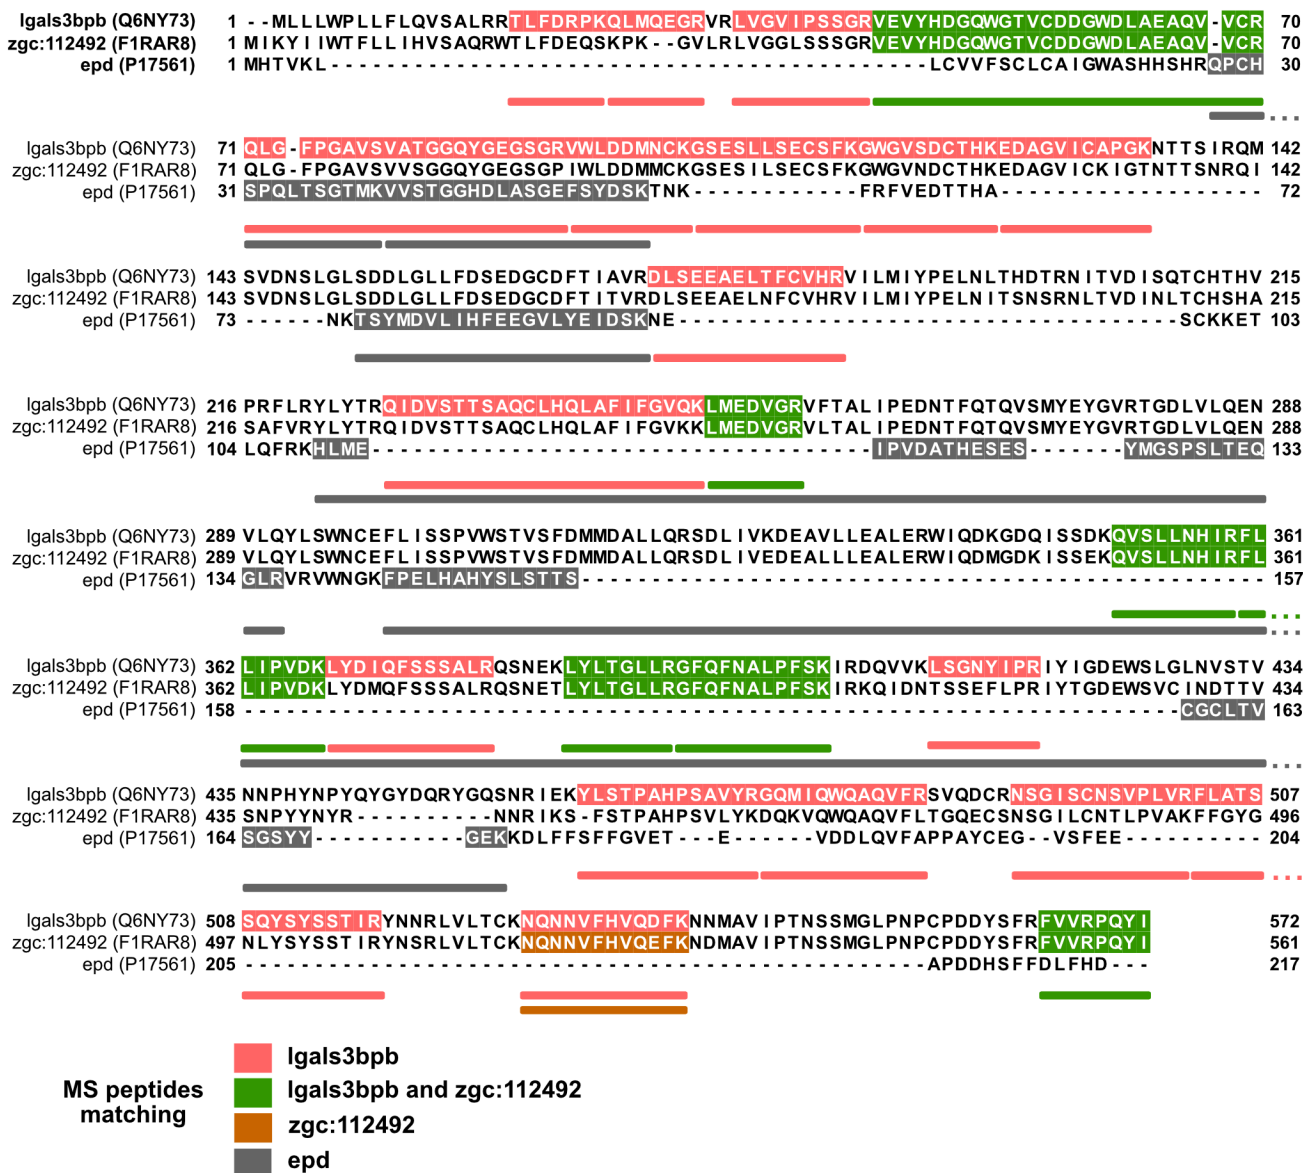

**Figure 3. Mapping of the proteotypic peptides shows specificity for the Lgals3bpb sequence. (A)** Sequence identity (%) between the coding sequences of *Igals3bpb*, *zgc:112492* and *epd*. Alignment performed using Clustal Omega (EMBL-EBI) **(B)** Multiple sequence alignment of the coding sequences of *Igals3bpb*, *zgc:112492* and *epd* with the identified peptides remapped on each sequence. Colors indicate the proteotypicity or group specificity of each identified tryptic peptide. The gene symbol and the UniProtKB identifier are shown.

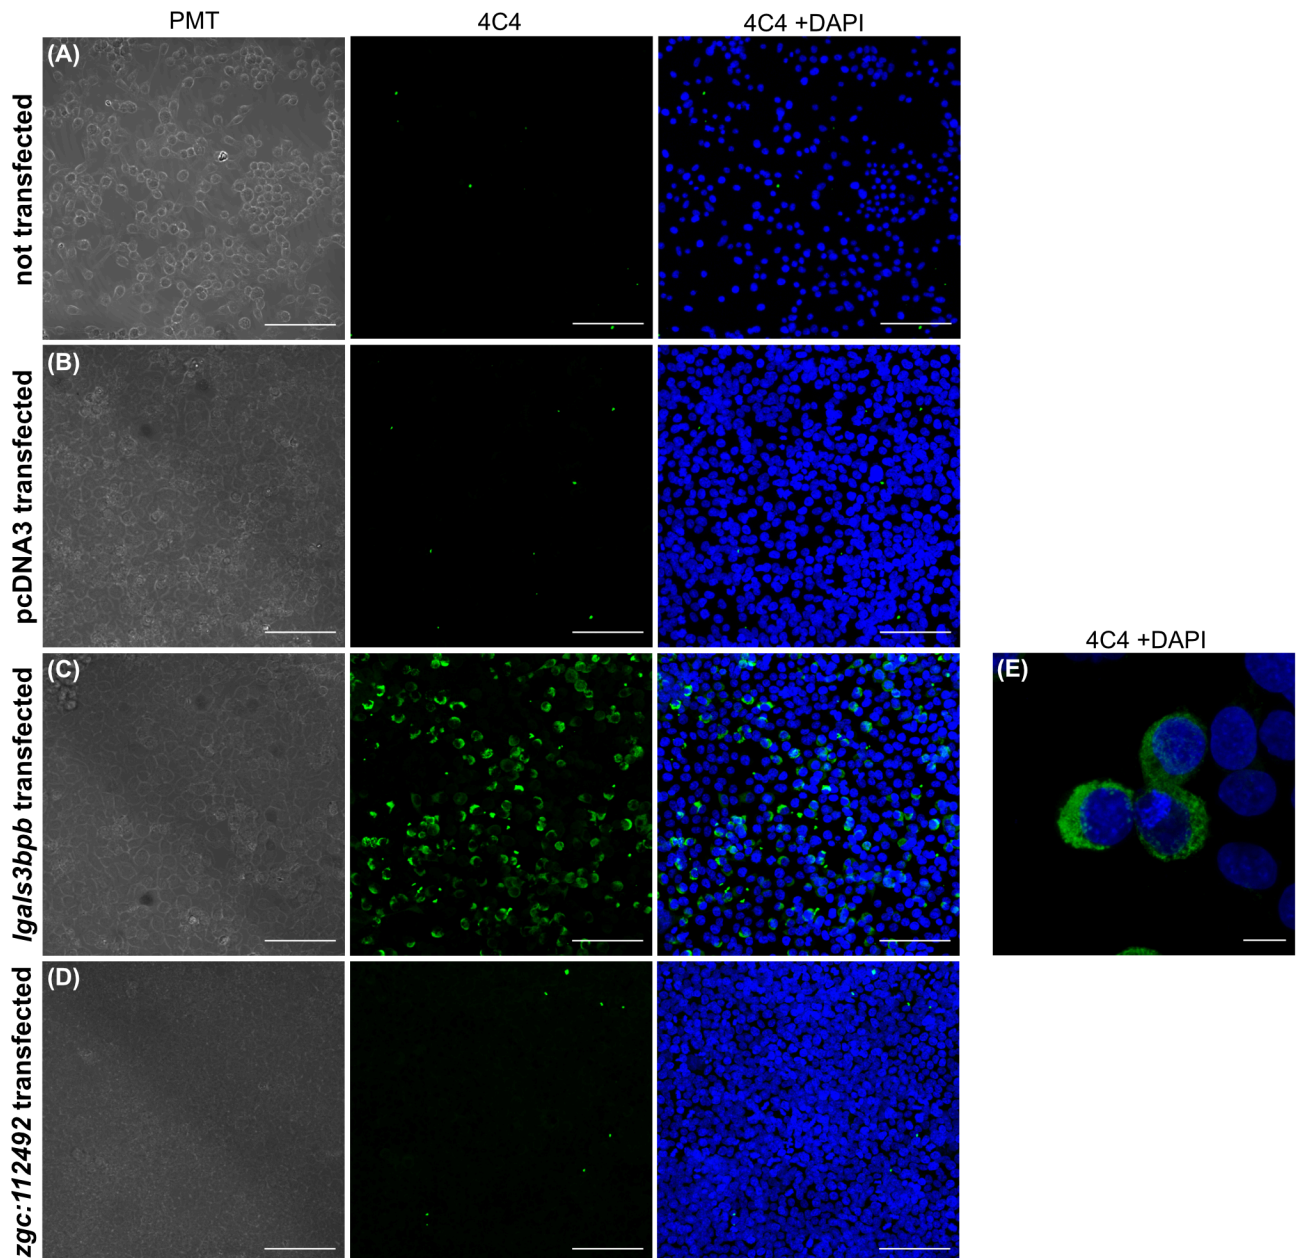

**Figure 4. Validation of *Igals3bpb* as the 4C4 antigen by recombinant protein expression in HEK293T cells. (A-E)** Immunofluorescence of HEK293T cells (A) or following transfection with the empty pcDNA3 plasmid (B) or *Igals3bpb* (C,E) and *zgc:112492* (D) coding sequences. Bright field (left panel), 4C4 staining (middle panel) and 4C4 with DAPI staining (right panel) channels are shown (3 independent experiments). Scale bars 100 μm. Images were taken using a 20X objective. (E) High magnification from pcDNA3-*Igals3bpb* transfected cells. Scale bar 10 μm. Image was taken using a 40X water-immersion objective and a numerical zoom of 3.



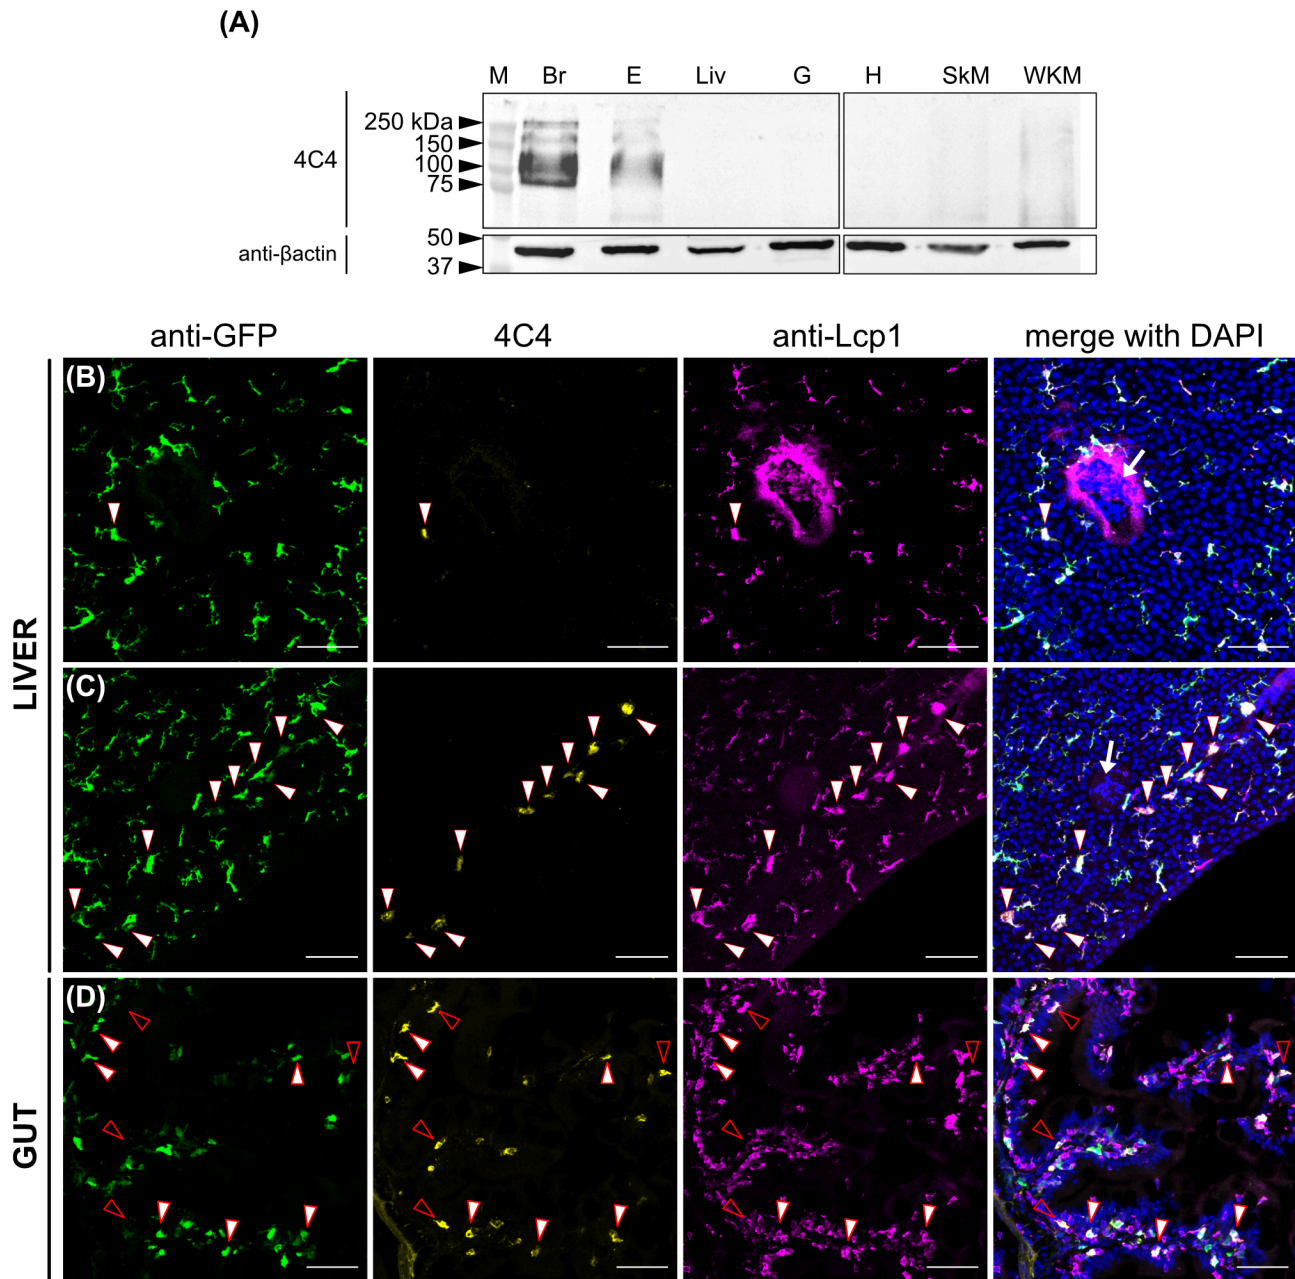

**Figure 5. Expression of *Igals3bpb* among adult tissues. (A)** Tissue distribution by western blot, using the 4C4 antibody and  $\beta$ actin as a loading control. Br, brain; E, eyes; Liv, liver, G, gut; H, heart; SkM, skeletal muscle; WKM, whole kidney marrow (n=3 fish/tissue). kDa, kilodaltons. **(B-D)** Immunofluorescence on liver (C-D) and gut (E) sections (14  $\mu$ m) from an adult *Tg(mpeg1:GFP)* fish. Anti-GFP (green), 4C4 (yellow), anti-Lcp1 (magenta) and a merge including DAPI staining of the three channels are shown. White arrowheads point to GFP<sup>+</sup> 4C4<sup>+</sup> Lcp1<sup>+</sup> cells while empty arrowheads point to GFP<sup>-</sup> 4C4<sup>+</sup> Lcp1<sup>+</sup> cells. White arrow in (C) and (D) merged channels show erythrocyte nuclei indicating the presence of a vessel. Images were taken using a 20X objective and correspond to orthogonal projections. (n=2). Scale bars 50  $\mu$ m.
